# Supplementary material
Source: publisher site journal article supplement (https://www.spandidos-publications.com/7148/downloadSupplementary)
Supplement: Supplementary file 1 [file downloadSupplementary]

## Sheet: Sheet1
Table SI. Expression data of FANCE in OSCC samples from TCGA
Sample	FANCE Expression
TCGA-CV-A6JT-01	8.2741
TCGA-HD-8635-01	8.7362
TCGA-CR-7395-01	9.0287
TCGA-BB-7863-01	8.7937
TCGA-CV-7427-01	8.2301
TCGA-CV-6436-01	7.8861
TCGA-CN-A63V-01	7.9884
TCGA-BA-A6DE-01	9.1644
TCGA-P3-A6T4-01	7.8873
TCGA-CV-7434-11	6.9015
TCGA-DQ-5631-01	8.1048
TCGA-CQ-A4CA-01	9.9981
TCGA-CR-7365-01	9.282
TCGA-F7-A61W-01	9.3533
TCGA-CV-6937-01	9.8033
TCGA-CQ-7069-01	7.4372
TCGA-KU-A66T-01	10.0402
TCGA-CN-4728-01	8.2513
TCGA-CR-7401-01	8.5414
TCGA-CV-5976-01	9.531
TCGA-CV-7254-01	8.5251
TCGA-BB-A6UO-01	8.9001
TCGA-CV-7411-01	9.4594
TCGA-HD-8635-11	8.1846
TCGA-BB-A5HZ-01	8.7788
TCGA-CV-6934-11	8.4606
TCGA-IQ-A61E-01	9.7225
TCGA-CQ-A4C7-01	8.4978
TCGA-DQ-5624-01	8.367
TCGA-CR-7391-01	8.143
TCGA-CV-A6JU-01	9.7225
TCGA-CV-6956-11	8.5621
TCGA-CR-7369-01	9.2133
TCGA-RS-A6TO-01	8.929
TCGA-CR-7376-01	7.6706
TCGA-CQ-5325-01	8.1371
TCGA-CV-7178-11	8.3364
TCGA-BA-A6DG-01	8.526
TCGA-CN-4729-01	8.9286
TCGA-CV-5979-01	8.9714
TCGA-CV-A45U-01	9.7014
TCGA-CV-7180-01	8.7774
TCGA-CR-6492-01	8.4737
TCGA-CR-7373-01	8.4317
TCGA-BA-4074-01	8.2512
TCGA-CV-7435-01	8.2973
TCGA-BA-A6DB-01	8.4004
TCGA-D6-6825-01	8.5557
TCGA-CN-6998-01	8.1816
TCGA-CV-6948-01	8.805
TCGA-UF-A7JC-01	9.0991
TCGA-MT-A7BN-01	7.249
TCGA-CV-A468-01	7.8294
TCGA-UF-A71E-01	10.0778
TCGA-CV-7434-01	8.8314
TCGA-CN-4736-01	9.1532
TCGA-BA-7269-01	8.7885
TCGA-CV-6433-01	9.7315
TCGA-CV-6441-01	8.7423
TCGA-CN-6017-01	7.2273
TCGA-CN-5367-01	9.8722
TCGA-CV-7252-01	9.2363
TCGA-QK-A6IG-01	8.0412
TCGA-CV-A45R-01	9.039
TCGA-CX-7219-01	8.4704
TCGA-BA-A6D8-01	8.037
TCGA-CR-7382-01	7.7571
TCGA-CV-6953-01	8.7148
TCGA-CQ-6221-01	7.4431
TCGA-CV-7432-11	7.4618
TCGA-H7-8502-01	9.6861
TCGA-CN-6020-01	9.2708
TCGA-P3-A5QA-01	7.4112
TCGA-CQ-7072-01	8.5966
TCGA-CN-6016-01	8.5995
TCGA-D6-6823-01	9.2947
TCGA-CV-7425-11	8.7809
TCGA-MT-A67F-01	9.3251
TCGA-CN-4725-01	9.2804
TCGA-CV-A463-01	9.0276
TCGA-CV-A45P-01	8.6975
TCGA-CV-7568-01	9.9195
TCGA-BB-4224-01	10.6161
TCGA-CQ-5326-01	9.1687
TCGA-CV-7183-11	9.0247
TCGA-CV-7423-11	8.355
TCGA-CN-6994-01	9.0033
TCGA-P3-A6T6-01	9.7787
TCGA-BA-5556-01	8.77
TCGA-QK-AA3K-01	8.4497
TCGA-CV-5966-01	8.743
TCGA-CV-6936-01	8.9885
TCGA-CQ-5332-01	9.1909
TCGA-CN-4734-01	8.84
TCGA-CQ-5327-01	8.7046
TCGA-UF-A71A-01	9.4651
TCGA-F7-A50J-01	8.4792
TCGA-CV-7100-01	9.5433
TCGA-CQ-A4C9-01	9.6779
TCGA-CV-A6JZ-01	9.1503
TCGA-D6-6827-01	9.588
TCGA-CQ-7068-01	9.311
TCGA-BA-5152-01	8.5829
TCGA-CV-A6JN-01	8.7016
TCGA-HD-8634-01	8.6277
TCGA-CV-6945-01	9.7529
TCGA-DQ-7588-01	9.6352
TCGA-DQ-5630-01	9.8313
TCGA-CV-7429-01	9.2507
TCGA-CN-4737-01	8.7849
TCGA-CV-7235-11	7.3449
TCGA-D6-A4ZB-01	10.5201
TCGA-CQ-5323-01	9.8334
TCGA-DQ-5625-01	9.0708
TCGA-CV-A6K2-01	9.0682
TCGA-IQ-A61G-01	10.2944
TCGA-F7-A61S-01	8.3939
TCGA-CV-A6JE-01	8.8381
TCGA-CN-4740-01	8.4772
TCGA-CV-A45V-01	8.9298
TCGA-UP-A6WW-01	9.3067
TCGA-CN-4742-01	9.0544
TCGA-CV-6942-01	8.6581
TCGA-CX-7085-01	8.2647
TCGA-BB-7872-01	8.6207
TCGA-IQ-A6SH-01	9.4585
TCGA-CV-6959-11	8.6388
TCGA-CV-7091-01	8.7597
TCGA-F7-8489-01	9.3978
TCGA-CN-A642-01	9.1052
TCGA-CN-6018-01	8.9637
TCGA-CV-A45Q-01	8.0314
TCGA-CQ-6222-01	8.4233
TCGA-P3-A6T3-01	9.7445
TCGA-C9-A480-01	8.7491
TCGA-CR-6488-01	7.7109
TCGA-DQ-7592-01	9.4248
TCGA-UF-A71B-01	8.9532
TCGA-T2-A6X2-01	9.807
TCGA-CV-6940-01	9.0882
TCGA-CV-7413-01	8.7066
TCGA-CV-7432-01	9.3496
TCGA-CQ-A4CE-01	8.4594
TCGA-CV-A45X-01	8.5813
TCGA-CV-7263-01	9.2153
TCGA-CV-A45T-01	8.3482
TCGA-CN-5359-01	8.5793
TCGA-CV-7097-11	7.2853
TCGA-CQ-5330-01	8.3362
TCGA-CV-5977-01	8.3935
TCGA-UF-A7JS-01	9.1523
TCGA-IQ-7632-01	8.8842
TCGA-CN-4730-01	9.3141
TCGA-C9-A47Z-01	9.4592
TCGA-CQ-6227-01	8.4035
TCGA-CV-7103-11	8.6001
TCGA-CV-7253-01	9.436
TCGA-H7-A6C4-11	7.6338
TCGA-CR-7377-01	7.8275
TCGA-HD-7831-01	8.646
TCGA-BA-6872-01	9.2167
TCGA-CV-7416-01	8.4458
TCGA-BB-A5HU-01	8.9941
TCGA-CQ-A4C6-01	8.4612
TCGA-CV-6960-11	8.8055
TCGA-CV-7099-01	8.5356
TCGA-CV-6955-01	8.6787
TCGA-CV-A6K0-01	8.0728
TCGA-BA-A6DJ-01	9.7365
TCGA-CV-6960-01	8.4057
TCGA-CQ-6228-01	9.966
TCGA-CV-7236-01	7.999
TCGA-HD-A4C1-01	9.0886
TCGA-CV-6939-11	6.7736
TCGA-CV-7255-01	9.3218
TCGA-4P-AA8J-01	8.8165
TCGA-BA-5558-01	8.2949
TCGA-P3-A5QF-01	10.0546
TCGA-CV-5973-01	8.0239
TCGA-QK-A8Z7-01	9.6943
TCGA-CV-6955-11	8.371
TCGA-CQ-A4CB-01	9.133
TCGA-CX-7086-01	9.084
TCGA-CR-7390-01	9.4432
TCGA-CV-7238-11	7.5549
TCGA-P3-A6T5-01	9.6442
TCGA-CV-7183-01	8.9988
TCGA-CQ-A4CI-01	9.8624
TCGA-CN-5358-01	8.6243
TCGA-CV-6941-01	9.3321
TCGA-BA-4075-01	9.5809
TCGA-CR-6484-01	8.3864
TCGA-CN-6024-01	9.2835
TCGA-UF-A7JT-01	8.8149
TCGA-MT-A67D-01	8.4115
TCGA-WA-A7GZ-11	8.342
TCGA-CR-7392-01	8.1595
TCGA-CR-7379-01	7.9549
TCGA-CX-7082-01	9.2396
TCGA-P3-A6T7-01	9.2142
TCGA-CN-4733-01	8.3701
TCGA-HD-7832-01	9.5626
TCGA-HD-A633-01	8.6684
TCGA-D6-8569-01	8.8156
TCGA-CR-7367-01	7.741
TCGA-IQ-A61H-01	9.1286
TCGA-WA-A7GZ-01	9.8171
TCGA-CV-5971-01	7.6748
TCGA-CV-6961-11	8.3327
TCGA-CV-A464-01	8.8818
TCGA-CV-5970-01	8.083
TCGA-CV-6938-11	8.183
TCGA-D6-A6EN-01	8.4797
TCGA-CV-6933-11	7.3423
TCGA-P3-A6T8-01	9.5246
TCGA-BA-6873-01	9.5142
TCGA-H7-8501-01	9.0079
TCGA-CN-5369-01	9.3037
TCGA-CV-7407-01	9.7426
TCGA-H7-7774-01	9.2518
TCGA-MT-A67A-01	8.1979
TCGA-CX-A4AQ-01	9.3375
TCGA-BB-8601-01	10.0341
TCGA-CR-6493-01	9.0257
TCGA-CR-7368-01	10.247
TCGA-CQ-7065-01	9.08
TCGA-F7-A624-01	8.2403
TCGA-CQ-5334-01	9.0659
TCGA-CV-6939-01	9.7194
TCGA-CV-5442-01	9.7119
TCGA-CV-7104-01	8.6761
TCGA-CQ-7063-01	8.9005
TCGA-QK-A6II-01	9.512
TCGA-CQ-A4CH-01	8.3622
TCGA-CN-4741-01	10.0633
TCGA-IQ-A61J-01	8.6431
TCGA-CV-7097-01	9.1986
TCGA-CQ-6218-01	8.2277
TCGA-CV-6952-01	9.2117
TCGA-CV-A6JO-01	7.94
TCGA-CV-6954-01	10.104
TCGA-CN-6013-01	8.3189
TCGA-D6-6515-01	7.9427
TCGA-BA-A6DD-01	9.3824
TCGA-CV-6959-01	9.5257
TCGA-QK-A8Z9-01	9.2593
TCGA-CV-7414-01	8.9542
TCGA-CQ-6224-01	8.4247
TCGA-UF-A7JD-01	8.5956
TCGA-CV-7178-01	9.3227
TCGA-HD-A6HZ-01	8.7308
TCGA-CV-7255-11	8.6317
TCGA-CV-7102-01	9.9415
TCGA-CQ-6223-01	8.9954
TCGA-CR-7394-01	8.1337
TCGA-CV-7103-01	7.8021
TCGA-CN-6019-01	8.9875
TCGA-CR-7380-01	8.6205
TCGA-HD-A6I0-11	7.1019
TCGA-T2-A6WX-01	8.7113
TCGA-CV-7425-01	9.384
TCGA-CV-7446-01	9.0862
TCGA-BA-5149-01	9.2771
TCGA-CQ-5324-01	8.9922
TCGA-CQ-7071-01	9.0379
TCGA-CV-6936-11	8.3621
TCGA-CV-7423-01	8.463
TCGA-HD-A6I0-01	9.2476
TCGA-CV-6934-01	8.1844
TCGA-CR-6491-01	9.6346
TCGA-P3-A6T0-01	8.5193
TCGA-BA-5557-01	8.6613
TCGA-CV-7252-11	8.2709
TCGA-UF-A7JO-01	9.3065
TCGA-CV-6003-01	8.6523
TCGA-CV-A45O-01	8.6086
TCGA-CV-7095-01	9.0368
TCGA-CQ-A4CG-01	8.8947
TCGA-CQ-5333-01	8.1348
TCGA-HD-7917-01	8.8408
TCGA-UF-A719-01	10.6879
TCGA-CV-7243-01	8.8473
TCGA-CV-6933-01	10.3005
TCGA-CV-A6JY-01	9.1285
TCGA-QK-A652-01	8.5845
TCGA-CV-7438-11	8.7172
TCGA-CQ-6229-01	9.0003
TCGA-QK-A64Z-01	8.7433
TCGA-CN-4731-01	9.8599
TCGA-CV-7416-11	8.2994
TCGA-IQ-7631-01	8.0637
TCGA-D6-6516-01	8.4708
TCGA-CV-5436-01	8.1815
TCGA-QK-A6IH-01	8.5947
TCGA-CV-7238-01	7.9686
TCGA-CN-6011-01	10.7057
TCGA-CR-7386-01	8.3435
TCGA-IQ-A6SG-01	9.8074
TCGA-CV-6956-01	10.1001
TCGA-CN-A49A-01	9.7064
TCGA-CV-7091-11	6.8189
TCGA-BA-5151-01	8.0895
TCGA-CV-7438-01	8.7908
TCGA-T2-A6WZ-01	8.8806
TCGA-CV-7090-01	8.3096
TCGA-P3-A6T2-01	8.9506
TCGA-CR-7372-01	8.9118
TCGA-CV-7235-01	10.0016
TCGA-CN-6995-01	9.7003
TCGA-CV-6938-01	8.2434
TCGA-CQ-6219-01	9.154
TCGA-CN-6996-01	8.9112
TCGA-CQ-5331-01	8.725
TCGA-CN-5373-01	8.9742
TCGA-CN-5370-01	8.8906
TCGA-HD-A6HZ-11	8.129
TCGA-CV-7428-01	9.7973
TCGA-CN-5364-01	9.1893
TCGA-HL-7533-01	9.3531
TCGA-F7-A50G-01	9.5326
TCGA-CN-4726-01	9.5194
TCGA-CR-7393-01	7.8231
TCGA-CQ-7067-01	9.4026
TCGA-CR-6471-01	9.5646
TCGA-D6-A6EO-01	9.4637
TCGA-H7-A6C4-01	8.6862
TCGA-QK-A6IJ-01	8.7779
TCGA-CR-7397-01	7.8437
TCGA-WA-A7H4-01	8.9074
TCGA-CV-6951-01	9.053
TCGA-UF-A71A-06	9.6804
TCGA-CV-A6JD-01	8.4212
TCGA-CQ-6220-01	9.6287
TCGA-CV-A465-01	8.3392
TCGA-CQ-A4CD-01	9.3409
TCGA-KU-A6H8-01	8.1741
TCGA-D6-A4Z9-01	9.1811
TCGA-UF-A7JA-01	10.033
TCGA-CQ-5329-01	9.4176
TCGA-CV-7409-01	7.3346
TCGA-CV-6961-01	8.95
TCGA-CQ-6225-01	9.3861
TCGA-QK-A6VB-01	9.5975
TCGA-MT-A51X-01	8.5466
TCGA-T3-A92N-01	8.3836
TCGA-D6-A6EM-01	8.8374
